# Supplementary material
Source: PubMed Central journal article supplement (PMC4357955)
Supplement: AEM.03973-14_zam999116125so1.pdf [file AEM.03973-14_zam999116125so1.pdf]

## Supplementary Figure

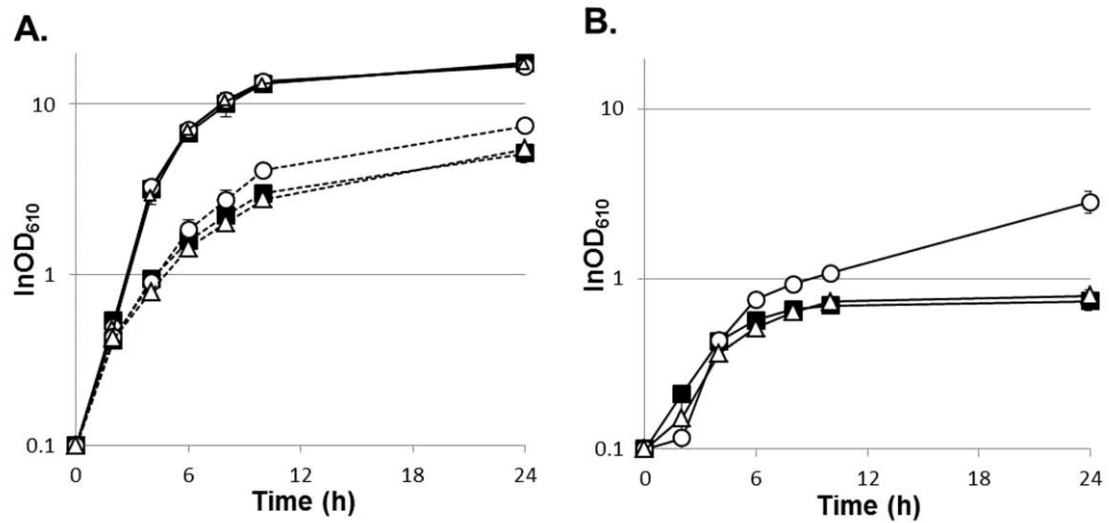

### Supplementary Figure 1. Plasmid-based overexpression of *pfk* and *pyk* restores the GLY3-like stress tolerance to GLY3dfy.

Growth curves of different strains with standard deviations ( $n = 3$ ). GLY3 with the empty vector pCRB12i (closed square), GLY3dfy with pCRB12i (open circle), and GLY3dfy with pCRE558, the construct for overexpression of *pfk* and *pyk* (open triangle), grown in nutrient-rich medium supplemented with 50  $\mu\text{g/ml}$  kanamycin and 10  $\mu\text{M}$  IPTG. **A.** Growth at 33 °C (solid lines) and 40 °C (dashed lines). **B.** Growth in the presence of 1.75 % (v/v) isobutanol.

## Supplementary Tables

**Supplementary Table 1. mRNA ratio of the genes in the regions 1 and 2**

| Gene<br>(locus_tag) | Region                 | mRNA ratio             |       |            |       |            |       |         |
|---------------------|------------------------|------------------------|-------|------------|-------|------------|-------|---------|
|                     |                        | trm2/GLY3              |       | tam44/GLY3 |       | tam45/GLY3 |       | GLY3    |
|                     |                        | 33°C                   | 41°C  | 33°C       | 41°C  | 33°C       | 41°C  | 41/33°C |
| CgR_2322            | region 1 <sup>*1</sup> | 0.03                   | 0.02  | 0.01       | 0.02  | 0.02       | 0.02  | 0.57    |
| CgR_2323            |                        | 0.15                   | 0.09  | 0.1        | 0.1   | 0.08       | 0.06  | 1.01    |
| CgR_2324            |                        | 0.05                   | 0.01  | 0.03       | 0.02  | 0.04       | 0.02  | 1.60    |
| CgR_2325            |                        | 0.09                   | 0.02  | 0.04       | 0.01  | 0.06       | 0.04  | 2.69    |
| CgR_2326            |                        | 0.01                   | 0.08  | 0.02       | 0.21  | 0.01       | 0.11  | 0.09    |
| CgR_2327            |                        | 0.001                  | 0.003 | 0.005      | 0.001 | 0.002      | 0.002 | 0.38    |
| CgR_2328            |                        | 0.19                   | 0.19  | 0.22       | 0.17  | 0.19       | 0.09  | 0.45    |
| CgR_2329            |                        | 0.21                   | 0.32  | 0.29       | 0.42  | 0.20       | 0.30  | 0.35    |
| CgR_0733            |                        | region 2 <sup>*1</sup> | 0.05  | 0.12       | 0.03  | 0.03       | 0.04  | 0.03    |
| CgR_0734            | 0.56                   |                        | 0.62  | 0.74       | 0.56  | 0.52       | 0.37  | 0.52    |
| CgR_6038            | 0.06                   |                        | 0.05  | 0.10       | 0.07  | 0.08       | 0.07  | 0.35    |
| CgR_6039            | 0.23                   |                        | 0.34  | 0.25       | 0.36  | 0.18       | 0.23  | 0.35    |
| CgR_6040            | 0.02                   |                        | 0.02  | 0.02       | 0.05  | 0.02       | 0.02  | 0.59    |
| CgR_6041            | 0.02                   |                        | 0.05  | 0.02       | 0.03  | 0.01       | 0.03  | 0.25    |
| CgR_6042            | 0.02                   |                        | 0.03  | 0.01       | 0.04  | 0.01       | 0.04  | 0.26    |
| CgR_6043            | 0.03                   |                        | 0.03  | 0.04       | 0.04  | 0.04       | 0.05  | 0.36    |
| CgR_6044            | 0.32                   |                        | 0.45  | 0.51       | 0.75  | 0.34       | 0.44  | 0.23    |
| CgR_6045            | 0.18                   |                        | 0.17  | 0.25       | 0.21  | 0.16       | 0.12  | 0.22    |
| CgR_6046            | 0.09                   |                        | 0.16  | 0.11       | 0.19  | 0.10       | 0.15  | 0.38    |
| CgR_6047            | 0.02                   |                        | 0.02  | 0.04       | 0.04  | 0.01       | 0.03  | 0.56    |
| CgR_6048            | 0.32                   | 0.47                   | 0.42  | 0.46       | 0.31  | 0.28       | 0.37  |         |

<sup>\*1</sup> For genomic organization of each region, see Figure 2.

**Supplementary Table 2. Genomic deletions common to the three evolved strains.**

| Position (nt)            | Gene                   |                        | Protein                                | Deletion             |
|--------------------------|------------------------|------------------------|----------------------------------------|----------------------|
|                          | Locus_tag              | Name                   |                                        |                      |
| region1: 2555774-2560443 | CgR_1327               | <i>pfk</i> (transgene) | 6-phosphofruktokinase                  | Entire ORF           |
|                          | CgR_2811               | <i>pyk</i> (transgene) | Pyruvate kinase                        | Entire ORF           |
|                          | CgR_2322               |                        | Putative transposase                   | Entire ORF           |
|                          | CgR_2323               |                        | Putative transposase                   | Entire ORF           |
|                          | CgR_2324               |                        | Putative transposase                   | Entire ORF           |
|                          | CgR_2325               |                        | Putative transcriptional regulator     | Entire ORF           |
|                          | CgR_2326               |                        | Putative major facilitator transporter | Entire ORF           |
|                          | CgR_2327               |                        | Hypothetical protein                   | 1-363 nt of ORF      |
|                          | region2: 793044-799509 | CgR_0733               |                                        | Hypothetical protein |
| CgR_0734                 |                        |                        | Hypothetical protein                   | 54-126 nt of ORF     |
| CgR_6038                 |                        |                        | Hypothetical protein                   | Entire ORF           |
| CgR_6039                 |                        |                        | Hypothetical protein                   | Entire ORF           |
| CgR_6040                 |                        |                        | Hypothetical protein                   | Entire ORF           |
| CgR_6041                 |                        |                        | Hypothetical protein                   | Entire ORF           |
| CgR_6042                 |                        |                        | Hypothetical protein                   | Entire ORF           |
| CgR_6043                 |                        |                        | Hypothetical protein                   | Entire ORF           |
| CgR_6044                 |                        |                        | Hypothetical protein                   | Entire ORF           |
| CgR_6045                 |                        |                        | Hypothetical protein                   | Entire ORF           |
| CgR_6046                 |                        |                        | Hypothetical protein                   | Entire ORF           |
| CgR_6047                 |                        | Hypothetical protein   | Entire ORF                             |                      |

**Supplementary Table 3. Point mutations identified in the evolved strains.**

| Presence/Absence (p/a) |       |       | Number of mutations identified |            |            |     |
|------------------------|-------|-------|--------------------------------|------------|------------|-----|
| trm2                   | tam44 | tam45 | Intragenic                     |            | Intergenic | Sum |
|                        |       |       | Non-synonymous                 | Synonymous |            |     |
| p                      | p     | p     | 14                             | 7          | 5          | 26  |
| p                      | p     | a     | 26                             | 17         | 6          | 49  |
| p                      | a     | p     | 0                              | 0          | 0          | 0   |
| a                      | p     | p     | 0                              | 0          | 0          | 0   |
| p                      | a     | a     | 30                             | 18         | 11         | 59  |
| a                      | p     | a     | 37                             | 15         | 3          | 55  |
| a                      | a     | p     | 68                             | 29         | 9          | 106 |
| Total                  |       |       | 175                            | 86         | 34         | 295 |

**Supplementary Table 4. Intergenic mutations common to the evolved strains.**

| Position (nt) | Mutation | Upstream               |                  |                             | Downstream             |                  |                                | Thermotolerance* <sup>2</sup> |           |
|---------------|----------|------------------------|------------------|-----------------------------|------------------------|------------------|--------------------------------|-------------------------------|-----------|
|               |          | Position* <sup>1</sup> | Gene (locus_tag) | Protein                     | Position* <sup>1</sup> | Gene (locus_tag) | Protein                        | Introduction                  | Reversion |
| 1123184       | T>C      | +24 nt                 | CgR_1015         | Thiol-disulfide isomerase   | -56 nt                 | CgR_1016         | Hypothetical protein           | +/-                           | +/-       |
| 1509663       | G>A      | +572 nt                | CgR_1377         | Hypothetical protein        | -385 nt                | CgR_1378         | Hypothetical protein           | +/-                           | +/-       |
| 1553806       | G>A      | +194 nt                | CgR_1414         | Hypothetical protein        | -65 nt                 | CgR_1415         | Putative trypsin-like protease | +/-                           | +/-       |
| 1616056       | A>G      | +80 nt                 | CgR_1462         | Arginine repressor          | -88 nt                 | CgR_1463         | Argininosuccinate synthase     | +/-                           | +/-       |
| 3284814       | T>C      | +131 nt                | CgR_2959         | Proline-betaine transporter | -119 nt                | CgR_2960         | Putative membraneprotease      | +/-                           | +/-       |

\*<sup>1</sup> Position of the start or the end of an ORF is shown relative to the position of a mutation.

\*<sup>2</sup> Mutations were introduced to GLY3 (introduction), or replaced by the wild-type genes in the evolved strains (reversion). +/-: unchanged; +:increased; -:decreased
